# Supplementary material
Source: bioRxiv or medRxiv preprint supplement (https://www.biorxiv.org/content/biorxiv/early/2020/12/19/2020.12.18.423371/DC1/embed/media-1.pdf)
Supplement: Supplementary file [file media-1.pdf]

## Supplemental Information

Table S1. Resources

| Identifier                                      | Reagent/Material Name                                                                                           | Source                    | Description                   |
|-------------------------------------------------|-----------------------------------------------------------------------------------------------------------------|---------------------------|-------------------------------|
| <b>Cell Culture</b>                             |                                                                                                                 |                           |                               |
| Cat#85851                                       | mTeSR™ 1 Medium                                                                                                 | STEMCELL Technologies     | Media                         |
| Cat#05876                                       | mTeSR™ 1 Medium Without Phenol Red                                                                              | STEMCELL Technologies     | Media                         |
| Cat#15070063                                    | Penicillin-Streptomycin                                                                                         | Thermo Fischer Scientific | Media                         |
| Cat#72305                                       | Y-27632 (Dihydrochloride)                                                                                       | STEMCELL Technologies     | ROCK Inhibitor                |
| Cat #356231;<br>Lot # 5292003,<br>Lot # 9021357 | Matrigel Growth Factor Reduced Growth Factor Reduced (GFR) Basement Membrane Matrix, Phenol Red-free, LDEV-free | Corning                   | Matrigel                      |
| Cat#11039021                                    | DMEM/F12 (1:1) 1X                                                                                               | Thermo Fischer Scientific | DMEM/F-12                     |
| Cat#14190144                                    | Dulbecco's phosphate-buffered saline (DPBS) (1X)                                                                | Thermo Fischer Scientific | DPBS                          |
| Cat#A1110501                                    | StemPro™ Accutase™ Cell Dissociation Reagent                                                                    | Thermo Fischer Scientific | Accutase                      |
| Cat#201252-100                                  | Reservoir, single cavity, polypropylene, 290 mL, 8 row base geometry, 44 mm height, 25/pk                       | Agilent                   | Media/Reagent reservoir       |
| Cat#200856-100                                  | Lids, universal, clear, polystyrene, 100/pk                                                                     | Agilent                   | Reservoir and microplate lids |
| Cat#203852-100                                  | Reservoir, 2 column, polypropylene, 146 mL/column, 292 mL maximum, pyramid base geometries, 44 mm height, 25/pk | Agilent                   | 2-column reservoir            |
| Cat#202061-100                                  | Storage/reaction microplate, 24-well, polypropylene, 10 mL/square well, round bottoms, 44 mm height, 25/pk      | Agilent                   | 24-well microplate            |
| Cat#383721                                      | Vi-CELL™ XR Sample Vials                                                                                        | Beckman Coulter           | Cell counter sample tubes     |
| Cat#731196                                      | Vi-Cell XR Series Cell Viability Analyzer                                                                       | Beckman Coulter           | Cell counter                  |

|                       |                                                                                              |                           |                                     |
|-----------------------|----------------------------------------------------------------------------------------------|---------------------------|-------------------------------------|
| Cat#P96-1.5H-N        | 96 well glass bottom plate with high performance #1.5 cover glass                            | Cellvis                   | 96-well plate                       |
| Cat#657185            | Multi-well pates for suspension culture, 6 well, clear, lid with condensation rings, sterile | Greiner Bio-One           | 6-well plate                        |
| Cat#235940            | 1000 µL Conductive Filter Tips                                                               | Hamilton Company          | 1000 µL Hamilton tips with filter   |
| Cat#235985            | 300 µL Nested Conductive Tips                                                                | Hamilton Company          | 300 µL Hamilton tips without filter |
| <b>Flow Cytometry</b> |                                                                                              |                           |                                     |
| Cat#85851             | mTeSR™ 1 Medium                                                                              | STEMCELL Technologies     | Media                               |
| Cat#15070063          | Penicillin-Streptomycin                                                                      | Thermo Fischer Scientific | Media                               |
| Cat#A1110501          | StemPro Accutase Cell Dissociation Reagent                                                   | Thermo Fischer Scientific | Accutase                            |
| Cat#14190144          | Dulbecco's phosphate-buffered saline (DPBS) (1X)                                             | Thermo Fischer Scientific | DPBS                                |
| Cat#CLS430052         | 15 mL centrifuge tubes                                                                       | Corning                   |                                     |
| Cat#554655            | Fixation Buffer                                                                              | BD Biosciences            | BD Cytotfix™                        |
| Cat#10828010          | KnockOut™ Serum Replacement                                                                  | Thermo Fischer Scientific | KSO                                 |
| Cat#41640             | Dimethyl sulfoxide (DMSO)                                                                    | Sigma-Aldrich             | DMSO                                |
| Cat#AB0620            | Tubes, 0.2 mL, flat cap                                                                      | Thermo Fischer Scientific | 250 µl PCR tubes                    |
| Cat#561300            | Alexa Fluor® 647 Mouse anti-Human Nanog Clone N31-355                                        | BD Biosciences            |                                     |
| Cat#560796            | Alexa Fluor® 647 Mouse anti-SSEA-4 Clone MC813-70 (RUO)                                      | BD Biosciences            |                                     |
| Cat#560329            | Alexa Fluor® 647 Mouse anti-Oct3/4 Clone 40/Oct-3 (RUO)                                      | BD Biosciences            |                                     |
| Cat#565571            | Alexa Fluor® 647 Mouse IgG1 κ Isotype Control Clone MOPC-21 (RUO)                            | BD Biosciences            |                                     |
| Cat#560803            | Alexa Fluor® 647 Mouse IgG3, κ Isotype Control Clone J606 (RUO)                              | BD Biosciences            |                                     |
| Cat#50-121-5315       | Bovine Albumin Fraction V (7.5% solution)                                                    | Gibco                     | BSA                                 |
| Cat#9002-93-1         | Triton™ X-100                                                                                | Sigma-Aldrich             |                                     |
| Cat#554723            | BD Perm/Wash™ Perm/Wash™ Buffer                                                              | BD Biosciences            | BD Perm/Wash™                       |
| Cat#CO9766            | CytoFLEX S V4-B2-Y4-R3 Flow Cytometer (13 Detectors, 4 Lasers)                               | Beckman Coulter           | Flow cytometer                      |
|                       | FlowJo version 10.2                                                                          | Treestar                  | Flow cytometry analysis software    |

|                                                                                                                    |                                                                                  |                           |                            |
|--------------------------------------------------------------------------------------------------------------------|----------------------------------------------------------------------------------|---------------------------|----------------------------|
| Cat#08-772-5                                                                                                       | 96-Well, Non-Treated, U-Shaped-Bottom Microplate                                 | Thermo Fischer Scientific |                            |
| <b>Cytogenetic Analysis</b>                                                                                        |                                                                                  |                           |                            |
| Cat#9381M10                                                                                                        | 25cm <sup>2</sup> Rectangular Canted Neck Cell Culture Flask with Vented Cap     | Corning                   |                            |
| Cat#85851                                                                                                          | mTeSR™ 1 Medium                                                                  | STEMCELL Technologies     | Media                      |
| Cat#15070063                                                                                                       | Penicillin-Streptomycin                                                          | Thermo Fischer Scientific | Media                      |
| Cat#P7793                                                                                                          | Parafilm M                                                                       | Sigma-Aldrich             |                            |
| Cat#356231                                                                                                         | Growth Factor Reduced (GFR) Basement Membrane Matrix, Phenol Red-free, LDEV-free | Corning                   | Matrigel                   |
| <b>High Resolution 3D Imaging</b>                                                                                  |                                                                                  |                           |                            |
| Cat#C10046;<br>Lot#1813792<br>(5X final concentration);<br>Lot#1853335<br>and #1900978<br>(3X final concentration) | CellMask™ Deep Red Plasma Membrane Stain                                         | Thermo Fischer Scientific | CMDR plasma membrane stain |
| Cat#R37605                                                                                                         | NucBlue™ Live ReadyProbes™ Reagent                                               | Thermo Fischer Scientific | Nuclear DNA stain          |

**Table S2: Robotic Components**

| Component                                                                           | Description                                                                                                                                                 | Component                                                                            | Description                                                                                                                                                                       |
|-------------------------------------------------------------------------------------|-------------------------------------------------------------------------------------------------------------------------------------------------------------|--------------------------------------------------------------------------------------|-----------------------------------------------------------------------------------------------------------------------------------------------------------------------------------|
|    | <p><b>STAR Deck:</b><br/>Workplace within the enclosure of the Hamilton Microlab STAR</p>                                                                   |    | <p><b>12-13. Plate Park Positions:</b><br/>Positions on deck used to stage plates and their lids</p>                                                                              |
|    | <p><b>Internal Swivel Arm Plate (iSwap) Handler:</b><br/>Plate handler used to move plates, lids, racks and reservoirs</p>                                  |    | <p><b>14-15. 24 Well Microplate Stages:</b><br/>Positions on deck used to stage 24-well microplates and their lids</p>                                                            |
|    | <p><b>Compressed O-Ring Expansion (CO-RE) Grippers:</b><br/>A plate, reservoir and lid handling tool consisting of 2 paddles picked up by 2 channels</p>    |    | <p><b>16. Plate Stacker Carrier</b><br/>5 columns of stacking carriers that hold up to 5, 6- or 96-well plates each</p>                                                           |
|   | <p><b>1-2. Media Position:</b><br/>Positions on deck used to stage reservoirs</p>                                                                           |   | <p><b>17. Barcode Reader:</b><br/>Orbit presentation laser barcode scanner used for plate and lid barcode scanning</p>                                                            |
|  | <p><b>3-4. Tilt Module:</b><br/>Positions on deck used to tilt plates between 0-10 degrees</p>                                                              |  | <p><b>19. Celigo Cytometer:</b><br/>Bench-top, micro-well plate based, brightfield and fluorescent imaging system used for cell counting and growth tracking</p>                  |
|  | <p><b>6-7. Cold Plate Air-Cooled (CPAC) Elements:</b><br/>Heating and cooling blocks for plates and reservoirs</p>                                          |  | <p><b>20. Agilent Microplate Centrifuge:</b><br/>Robot-accessible automated centrifuge for microplates</p>                                                                        |
|  | <p><b>10. 1000µL Conductive Filter Tips Carrier:</b><br/>Filtered tips infused with carbon for capacitive liquid level detection, each rack has 96 tips</p> |  | <p><b>21. Cytomat 24:</b><br/>Automated incubator with plate hotel, shuttle system with 360 plate storage capacity. Kept at 37°C, 5% CO<sub>2</sub> and 85% relative humidity</p> |
|  | <p><b>11. 300µL Nested Conductive Tips Racks:</b><br/>Unfiltered tips nested in 5 racks, each rack has 96 tips</p>                                          |  | <p><b>22. Cytomat 6002:</b><br/>Automated refrigerator at 4°C with plate and reservoir hotel, shuttle system and capacity for 105 plates and 20 reservoirs</p>                    |

## Supplementary Experimental Procedures

### ***Calibration, priming/ initialization steps***

Preventative maintenance methods are run daily and weekly. These methods initialize and check the movements of the arm that carries the Internal Swivel Arm Plate Handler (iSwap) and channels, in addition to checking the movements of the carried components. Channel tightness is verified with both positive and negative timed pressure tests and concludes with the testing of each channel's capacitive liquid level detection sensor. Failure in these tests result in a re-test; if failures continue, service is called for maintenance. Semi-annual service consists of the inspection of belts, springs, and cables, as well as cleaning, replacement and lubrication of rails and spindles. Stop disks, O-rings, and washers are replaced twice a year. Finally, tip eject cycles are reset for tracking O-ring life.

### ***Daily Workflow***

The three crucial workflows (as outlined in **Figure 2**) and associate methods for (1) Plate Maintenance, (2) Passaging, and (3) Matrigel Coating of plates are listed and described in detail below. Each method is described and followed by a table containing the approximate timing, robotic equipment needed, and key action parameters (diagramed in **Figure 3**) relevant to each method.

### ***Supplementary Workflow: Thawing***

Frozen vials of source cells are thawed according to previously published cell culture methods (WTC Cell Culture v1.7, <https://www.allencell.org>). Adaptations to the automated method start after the manual resuspension of the cell pellet. Cell suspension is transferred to the 24-well microplate and seeded onto Matrigel-coated 6-well plates using the Microlab STAR platform and associated seeding protocols described here (Method 2.8 as described).

### ***Supplementary Workflow: Flow Cytometry Stemness Marker Staining***

Cells were harvested after 10 passages at 70-85% confluency and fixed with BD CytoFix Fixation Buffer (BD Biosciences) at 4°C for 30 min. Fixed cells were frozen at -80°C in KnockOut Serum Replacement (Thermo Fischer Scientific) with 10% dimethyl sulfoxide (Sigma Aldrich) for later processing in batches. Prior to staining for flow cytometry, cells were thawed, washed with 2% Bovine Albumin Fraction V (BSA, 7.5% Solution, Thermo Fischer Scientific) in Dulbecco's Phosphate-Buffered Saline (DPBS, Thermo Fischer Scientific) and split in half. For intracellular staining, one half of the cells were permeabilized using 0.1% Triton X-100 (Sigma Aldrich) and 2% BSA in DPBS for 30 min at RT. These cells were subsequently stained for transcription factors with anti—Nanog Alexa Fluor® 647, anti—Oct3/4 Alexa Fluor® 647, and Mouse IgG1 κ Isotype Control Alexa Fluor® 647 (all BD Biosciences), followed by a wash with BD Perm/Wash buffer (BD Bioscience). The other half of the cells were stained for stemness surface markers using anti-SSEA-4 Alexa Fluor 647 and Mouse IgG3 κ Isotype Control Alexa Fluor® 647 (all BD Biosciences) for 30 min at RT and then washed with 2% BSA in DPBS. Finally, both groups of cells were washed with 2% BSA in DPBS before a resuspension in 2% BSA in DPBS for flow cytometry acquisition. Flow cytometry was performed with a CytoFLEX S V4-B2-Y4-R3 Flow Cytometer (Beckman Coulter) equipped with 405-, 488-, 561-, and 637-nm lasers. Analysis was performed using FlowJo version 10.2 (Treestar). Further details for flow cytometry reagents and consumables can be found in **Table S1**. Cells were distinguished from debris using side-scatter versus forward-scatter area, and subsequently sorted using forward scatter and side scatter (height vs. width) to isolate singlets. To create positive staining thresholds, isotype controls were used. Positive gates for the reagents of interest were set to include 1-2% of isotype control cells.

The number of positive cells was then determined by the number of cells stained with the reagent of interest that fell within the positive gate. The commonly used guideline of >85% stemness-marker expression was used to verify stemness of cells (Baghbaderani et al., 2015). Representative histograms for each of the stemness markers resulting from the gating strategy explained above can be found in **Figure S1**.

**Table S3. Method and workflow key parameters**

| Workflow                    | Method                      | Timing       | Equipment                                                               | Parameters                                                                                                                                                                                                                                                                                                                                                                                                                                                                                                                                                                                                                                                                                                                                                                                                                                                                                                                                            |
|-----------------------------|-----------------------------|--------------|-------------------------------------------------------------------------|-------------------------------------------------------------------------------------------------------------------------------------------------------------------------------------------------------------------------------------------------------------------------------------------------------------------------------------------------------------------------------------------------------------------------------------------------------------------------------------------------------------------------------------------------------------------------------------------------------------------------------------------------------------------------------------------------------------------------------------------------------------------------------------------------------------------------------------------------------------------------------------------------------------------------------------------------------|
| <b>1: Plate Maintenance</b> | Media preparation           | ~50"         | Cytomat 6002, CPAC 1&2, iSwap, CO-RE Grippers                           | <ul style="list-style-type: none"> <li>Media from Cytomat 6002 warmed on CPAC set at 34°C for 30-40 min, then placed on Media Position 1</li> <li>Movements slowed when handling media, reagents, and tissue culture plates to ~¼ default speed of ~40 cm/sec for all steps in this workflow</li> </ul>                                                                                                                                                                                                                                                                                                                                                                                                                                                                                                                                                                                                                                               |
|                             | 96-well plate feeding       | 14'30"       | Cytomat 24, Tilt Module 1, iSwap CO-RE Grippers                         | <ul style="list-style-type: none"> <li>One plate at a time moved from Cytomat 24 to Tilt Module 1; tilted 10°</li> <li>300 µL tips on channels 1-3 aspirate media from the plate at 175 µL/sec and dispense 150 µL of new media from channels 4-6 at 75 µL/s</li> <li>Plate is returned to Cytomat 24, repeats for all 96-well plates</li> </ul>                                                                                                                                                                                                                                                                                                                                                                                                                                                                                                                                                                                                      |
|                             | 6-well plate feeding        | 6'45"        | Cytomat 24, Tilt Module 1, iSwap CO-RE Grippers                         | <ul style="list-style-type: none"> <li>One plate at a time moved from Cytomat 24 to Tilt Module 1; tilted 10°</li> <li>1,000 µL tips on channels 1-4 (two per well) aspirate media from the plate at 175 µL/sec and dispense 2 mL of media from channels 4-8 (two per well) at 75 µL/sec</li> <li>Plate is returned to Cytomat 24, repeats for all 6-well plates</li> </ul>                                                                                                                                                                                                                                                                                                                                                                                                                                                                                                                                                                           |
|                             | Plate imaging               | 1'30" to 20' | Cytomat 24, Tilt Module 1, iSwap CO-RE Grippers, Celigo Cytometer       | <ul style="list-style-type: none"> <li>One plate at a time removed from Cytomat 24, imaged and returned to the Cytomat 24 - all movements performed using the iSwap</li> </ul>                                                                                                                                                                                                                                                                                                                                                                                                                                                                                                                                                                                                                                                                                                                                                                        |
|                             | Media storage               | 3' to 4'30"  | Cytomat 6002, CPAC 1&2, CO-RE Grippers                                  | <ul style="list-style-type: none"> <li>Media stored in Cytomat 6002 at 4°C using the iSwap</li> </ul>                                                                                                                                                                                                                                                                                                                                                                                                                                                                                                                                                                                                                                                                                                                                                                                                                                                 |
| <b>2: Passaging</b>         | Media preparation           | 8'30"        | Cytomat 6002, CPAC 1, iSwap CO-RE Grippers                              | <ul style="list-style-type: none"> <li>DPBS, Accutase, mTeSR1 + ROCK Inhibitor (RI), and the 24-well microplate are staged on the deck from the Cytomat 24 (<b>Figure 1B</b>)</li> <li>mTeSR1 + RI is mixed in 2-column reservoir on the deck at 300 µL/sec</li> <li>Accutase is warmed on CPAC 2 at 37°C</li> <li>Movements slowed when handling media, reagents and cells culture plates to ~¼ default speed of ~ 40 cm/sec *for all methods in this workflow</li> </ul>                                                                                                                                                                                                                                                                                                                                                                                                                                                                            |
|                             | 6-well plate incubation     | 6'           | Cytomat 6002, Cyomat 24, iSwap CO-RE Grippers, Barcode reader           | <ul style="list-style-type: none"> <li>Matrigel-coated 6-well plates moved from 4°C Cytomat 6002 to 37°C Cytomat 24 for ≥2 hrs prior to Matrigel removal and seeding</li> </ul>                                                                                                                                                                                                                                                                                                                                                                                                                                                                                                                                                                                                                                                                                                                                                                       |
|                             | 96-well plate incubation    | 11'15"       | Cytomat 6002, Cyomat 24, iSwap CO-RE Grippers, Barcode reader           | <ul style="list-style-type: none"> <li>Matrigel-coated 96-well plates moved from 4°C Cytomat 6002 to 37°C for ≥2 hrs prior to Matrigel removal and seeding</li> </ul>                                                                                                                                                                                                                                                                                                                                                                                                                                                                                                                                                                                                                                                                                                                                                                                 |
|                             | 6-well plate disassociation | 28'          | Cytomat 6002, Cyomat 24, iSwap, CO-RE Grippers, Tilt module 1, CPAC 1&2 | <ul style="list-style-type: none"> <li>For this method: aspirations 200 µL/sec, dispenses 150 µL/sec</li> <li>6-well plate moved from Cytomat 24 and onto Tilt Module 1; tilted 10° and, media removed and each well washed with 2 mL of media</li> <li>1 mL of warm Accutase added/well; plate incubated on CPAC 1 at 37°C for 4 min</li> <li>Row D of the 24-well microplate (<b>Figure 3F</b>) receives 4 mL of DPBS/well prior to cell pooling</li> <li>Two 1,000 µL tips triturate/well at defined angle, speed and location (<b>Figure 3A</b>)</li> <li>Accutase/DPBS cell suspension from each well transferred to the corresponding well in Row D of 24-well microplate (<b>Figure 3H</b>)</li> <li>1 mL DPBS added/well and transferred to corresponding well in Row D of 24-well microplate to wash remaining cells from wells</li> <li>24-well microplate moved at ~¼ default speed (40 cm/sec) to Vspin Centrifuge using iSwap</li> </ul> |

|                            |                             |        |                                                  |                                                                                                                                                                                                                                                                                                                                                                                                                                                                                                                                                                                                                                                                                                                                                                                                                                                                                                                                                                                                                                                                                                                                                                                                                                                                                                                                                                                                                                 |
|----------------------------|-----------------------------|--------|--------------------------------------------------|---------------------------------------------------------------------------------------------------------------------------------------------------------------------------------------------------------------------------------------------------------------------------------------------------------------------------------------------------------------------------------------------------------------------------------------------------------------------------------------------------------------------------------------------------------------------------------------------------------------------------------------------------------------------------------------------------------------------------------------------------------------------------------------------------------------------------------------------------------------------------------------------------------------------------------------------------------------------------------------------------------------------------------------------------------------------------------------------------------------------------------------------------------------------------------------------------------------------------------------------------------------------------------------------------------------------------------------------------------------------------------------------------------------------------------|
|                            | Cell centrifugation         | 3'30"  | Vspin Centrifuge                                 | <ul style="list-style-type: none"> <li>24-well microplate centrifuged at 1,000 rpm (RCF = 211 x g) for 3 min.</li> </ul>                                                                                                                                                                                                                                                                                                                                                                                                                                                                                                                                                                                                                                                                                                                                                                                                                                                                                                                                                                                                                                                                                                                                                                                                                                                                                                        |
|                            | Cell seeding preparation    | 18'58" | Cytomat 6002, iSwap, CO-RE Grippers              | <ul style="list-style-type: none"> <li>For this method: aspirations 200 µL/sec, dispenses 200 µL/sec, mixes 200 µL/sec</li> <li>24-well microplate returned to STAR deck and supernatant is aspirated from defined location to ensure pellet is undisturbed (<b>Figure 3G</b>).</li> <li>To disperse the cell pellet: 2.5 mL mTeSR1 + RI added per well of Row D at different locations within the well (<b>Figure 3G</b>)</li> <li>Cell suspension mixed at bottom of the well to get single cell suspension and dispensed at the top of the well to ensure even distribution of the cells throughout the suspension</li> <li>200 µL/well from Row D aspirated and dispensed in Vi-Cell Counting Tubes in another 24-well microplate (<b>Figure 1, position 15</b>) on STAR deck; tubes then cell counting step.</li> <li>2 mL/well of mTeSR1 + RI added to Row C of 24-well microplate (<b>Figure 3F</b>)</li> <li>5 mL/well of mTeSR1 + RI added to Row B of 24-well microplate (<b>Figure 3F</b>)</li> <li>Unused DPBS and Accutase returned to the Cytomat 6002</li> <li>Calculated volume for the desired final cell concentrations for 6- and 96-well plates is entered by the operator</li> <li>Calculated volume of cell suspension added to Row C to total 3 mL/well to seed two 6-well plates</li> <li>Calculated volume of cell suspension added to Row B to total 6 mL/well to seed five 96-well plates</li> </ul> |
|                            | 6-well plate seeding        | 26'    | Tilt module 1, Cyomat 24, iSwap, CO-RE Grippers, | <ul style="list-style-type: none"> <li>For this method: aspirations 200 µL/sec, mixes 125 µL/sec, dispenses 125µL/sec</li> <li>One of two 6-well plates from Cytomat 24 brought to Tilt Module 1 at 10°; all Matrigel is removed and 1 mL/well of mTeSR1 + RI added</li> <li>Two 1,000 µl tips/well mix (<b>Figure 3G</b>) and aspirate from Row C to seed at distinct locations in 6-well plate (<b>Figure 3B</b>)</li> <li>Plate returned to the Cytomat 24; sequence repeats for second plate</li> </ul>                                                                                                                                                                                                                                                                                                                                                                                                                                                                                                                                                                                                                                                                                                                                                                                                                                                                                                                     |
|                            | 96-well plate seeding       | 33'45" | Tilt module 1, Cyomat 24, iSwap, CO-RE Grippers, | <ul style="list-style-type: none"> <li>For this method: aspirations and mixes 100 µL/sec, dispenses 30 µL/sec along the side of the well (<b>Figure 3D</b>)</li> <li>One of five 96-well plates from Cytomat 24 brought to Tilt Module 1 at 10°; all Matrigel is removed, 1 mL of mTeSR1 + RI aspirated with channels 1-6, 100 µL/well of mTeSR1 + RI added such that each channel dispense 1 ten times across six rows of wells</li> <li>1,000 µL tips on channels 1-6 mix (<b>Figure 3G</b>) and aspirate 1 mL of cell suspension/well from Row B, 100 µL of cell suspension dispensed to rows B-G, columns 2-11, down the side of the well (<b>Figure 3D</b>)</li> <li>Plate returned to the Cytomat 24; sequence repeats for remaining four plates</li> </ul>                                                                                                                                                                                                                                                                                                                                                                                                                                                                                                                                                                                                                                                               |
| <b>3: Matrigel coating</b> | Matrigel preparation        | 8'45"  | Cytomat 6002, CPAC 1, iSwap, CO-RE Grippers      | <ul style="list-style-type: none"> <li>For this method: mix at 250 µL/sec and dispense at 300 µL/sec</li> <li>Matrigel (MG) and DMEM/F-12 mixed in 2-column reservoir (brought from Cytomat 6002) on CPAC 1 at 4°C.</li> <li>Final protein concentration of 0.185 mg/mL.</li> </ul>                                                                                                                                                                                                                                                                                                                                                                                                                                                                                                                                                                                                                                                                                                                                                                                                                                                                                                                                                                                                                                                                                                                                             |
|                            | 96-well plate Matrigel coat | 30'    | Cytomat 6002 CPAC 1&2, iSwap, CO-RE Grippers,    | <ul style="list-style-type: none"> <li>For this method: aspirations 150 µl/sec and dispenses 125 µl/sec</li> <li>Five 96-well plates, one at a time, moved from Cytomat 6002 to CPAC 2 at 4°C; 1 mL diluted MG aspirated by 6 channels, then dispensed to the 96-well plate, 100 µL/well (<b>Figure 3E</b>)</li> <li>96-well plate returned to Cytomat 6002 at 4°C for at least overnight; process repeats for any number of 96-well plates</li> </ul>                                                                                                                                                                                                                                                                                                                                                                                                                                                                                                                                                                                                                                                                                                                                                                                                                                                                                                                                                                          |
|                            | 6-well plate Matrigel coat  | 10'30" | Cytomat 6002, CPAC 1&2, iSwap, CO-RE Grippers    | <ul style="list-style-type: none"> <li>For this method: aspirations and dispenses 200 µl/sec</li> <li>Two 6-well plates, one at a time, moved from Cytomat 6002 to CPAC 2 at 4°C; four channels aspirate 750 µl diluted MG and two channels/well dispense 1.5 mL/well; aspiration and dispense repeats twice more to coat all six wells (<b>Figure 3C</b>)</li> <li>6-well plate picked up by CO-RE grippers, swiftly moved around the deck to distribute MG, and returned to Cytomat 6002 at 4°C for at least overnight; process repeats for any number of 6-well plates</li> </ul>                                                                                                                                                                                                                                                                                                                                                                                                                                                                                                                                                                                                                                                                                                                                                                                                                                            |

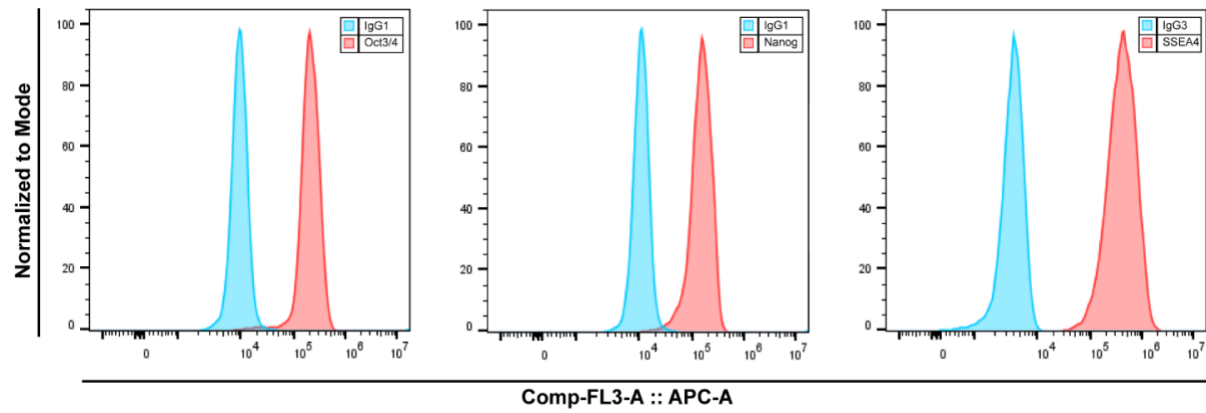

**Figure S1. Flow Cytometry Histogram:** Example histograms resulting from the gating of pluripotency markers. Isotype control antibodies are in blue; from left to right the pluripotency markers are as follows in red: Oct3/4, Nanog, and SSEA4.
